# Supplementary material for: Probiotic <em>Bacillus</em> Species: Promising Biological Control Agents for Managing Worrisome Wheat Blast Disease
Source: Preprints.org preprint supplement (doi:10.20944/preprints202211.0382.v1), 2022-11-21
Supplement: Supplementary file 1 [file supplementary]

## Supplementary Figure 1

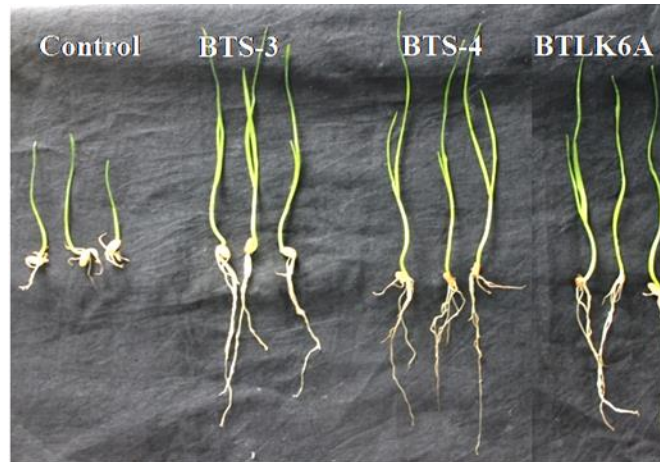

**Supplementary figure 1:** Enhancement of wheat seedling growth by seed endophytic probiotic bacteria. Surface sterilized wheat seeds cv. BARI Gom 24 (Prodip) was coated with selected bacteria (ca.  $1 \times 10^9$  CFU/ml) and incubated at 25 °C for 7 d maintaining 12/12 h light-dark alternations. Where, BTS-3: *Bacillus subtilis* BTS-3, BTS-4: *B. velezensis* BTS-4, BTLK6A: *B. velezensis* BTLK6A.

**Supplementary table 1:** Enhancement of seed germination, vigor and shoot-root biomass of wheat seedling cv. BARI Gom 24 (Prodip) by using seed endophytic probiotic bacteria.

| Bacterial isolate | Germination (%) | Vigor index | Shoot biomass (mg/3 seedlings) | Root biomass (mg/3 seedlings) |
|-------------------|-----------------|-------------|--------------------------------|-------------------------------|
| BTS-3             | 77.87ab         | 1425.03bc   | 39.23b                         | 14.20b                        |
| BTS-4             | 86.48b          | 1688.95c    | 68.73c                         | 18.96b                        |
| BTLK6A            | 80.77ab         | 1432.05b    | 56.90d                         | 14.90b                        |
| Healthy control   | 67.62a          | 486.86a     | 26.00a                         | 6.80a                         |

BTS-3: *Bacillus subtilis* BTS-3, BTS-4: *B. velezensis* BTS-4, BTLK6A: *B. velezensis* BTLK6A. Where, n = 6, ANOVA with Tukey multiple comparison test,  $p < 0.05$ ; same letters are not significantly varied from each other.
